# Supplementary material
Source: PubMed Central journal article supplement (PMC4364241)
Supplement: pnas.201419699SI.pdf [file pnas.201419699SI.pdf]

# Supporting Information

Sugita et al. 10.1073/pnas.1419699112

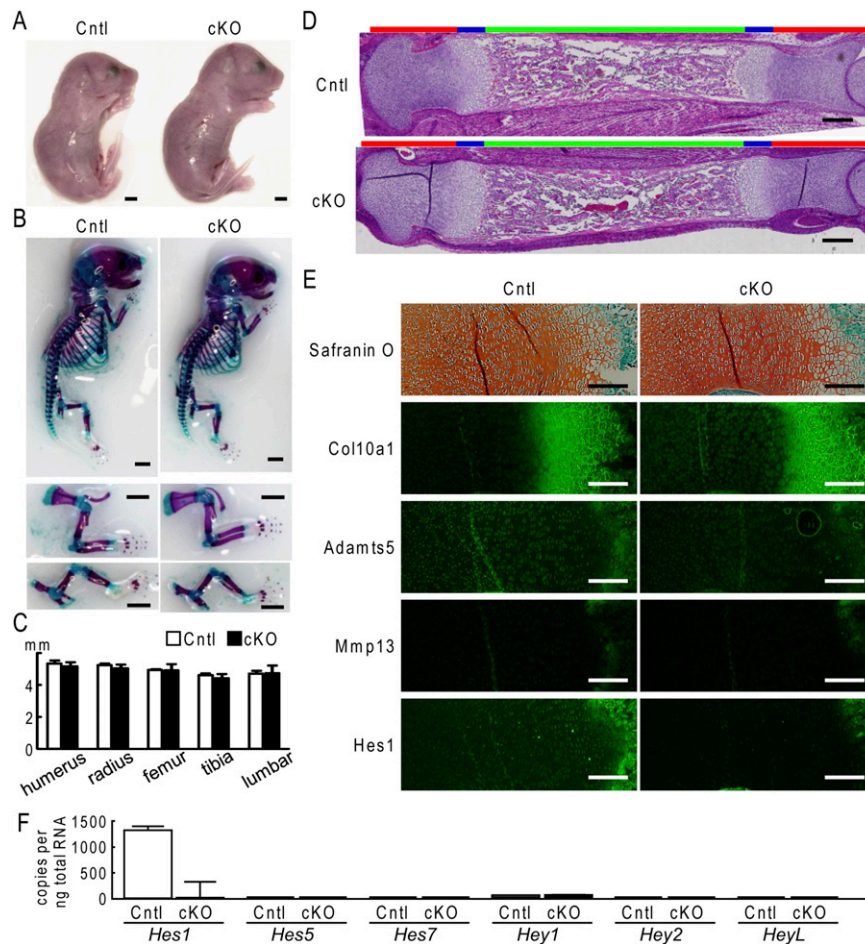

**Fig. S1.** Normal skeletal formation in *Sox9-Cre;Hes1<sup>fl/fl</sup>* mouse embryos. (A) Gross appearance of *Hes1<sup>fl/fl</sup>* (Cntl) and *Sox9-Cre;Hes1<sup>fl/fl</sup>* (cKO) littermate embryos (E18.5). (Scale bars, 1 mm.) (B) Double staining with Alizarin red and Alcian blue of the whole skeleton (Top), upper extremities (Middle), and lower extremities (Bottom) of Cntl and cKO littermate embryos (E18.5). (Scale bars, 1 mm.) (C) Length of long bones and vertebra (first to fifth lumbar spines) of Cntl and cKO littermate embryos (E18.5). Data are expressed as means  $\pm$  SD of five mice per group. (D) H&E staining of whole tibias of Cntl and cKO littermate embryos (E18.5). (Scale bars, 200  $\mu$ m.) Upper bars indicate lengths of the proliferative zone (red), hypertrophic zone (blue), and bone area (green). (E) Safranin-O staining and immunofluorescence with antibodies to Col10a1, Adamts5, Mmp13, and Hes1 in proximal tibias of Cntl and cKO littermate embryos (E18.5). (Scale bars, 200  $\mu$ m.) (F) mRNA levels of Hes1, Hes5, Hes7, Hey1, Hey2 and HeyL in costal chondrocytes from Cntl and cKO littermate embryos (E18.5). Data are expressed as means  $\pm$  SD of three mice per group.

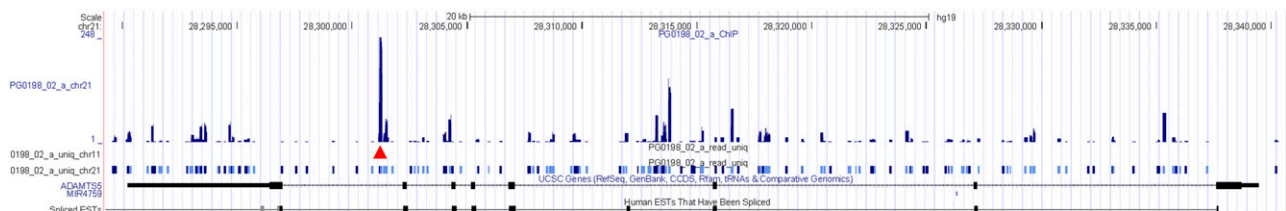

**Fig. S2.** ChIP-seq data from *ADAMT55*. Genome Browser display of the *ADAMT55* locus on chr21 from the human assembly. The University of California Santa Cruz genome browser ([genome.ucsc.edu](http://genome.ucsc.edu)) was used to visualize these findings. The highest peak is evident between +37,134 and +37,623 bp from the transcription start site (red arrowhead).

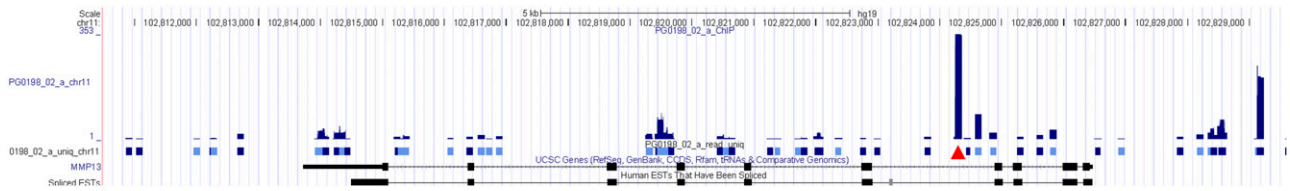

**Fig. S3.** ChIP-seq data from *MMP13*. Genome Browser display of the *MMP13* locus on chr11 from the human assembly. The highest peak is evident between +2,082 and +2,182 bp from the transcription start site (red arrowhead).

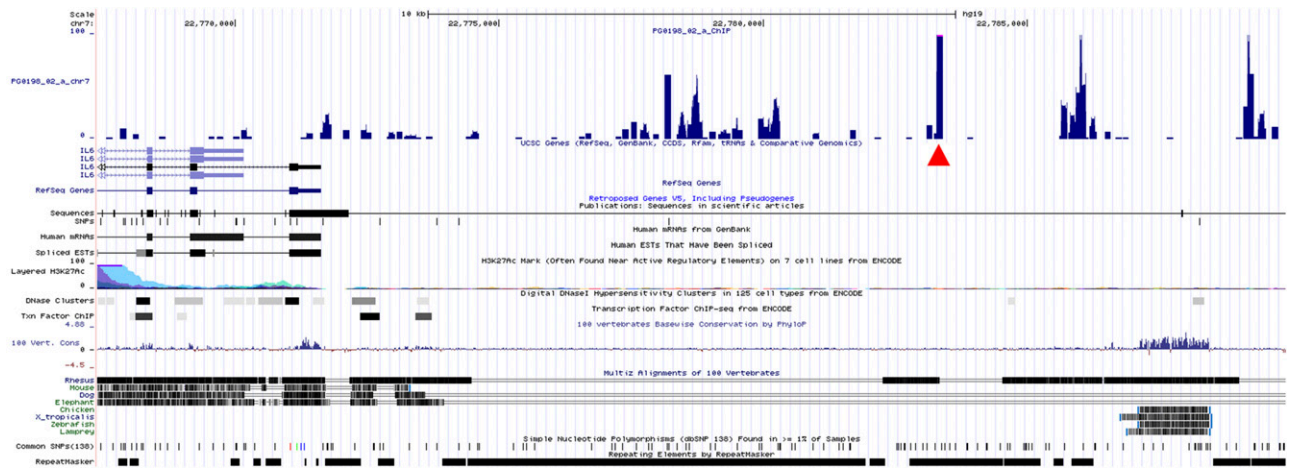

**Fig. S4.** ChIP-seq data from *IL6*. Genome Browser display of the *IL6* locus on chr7 from the human assembly. The highest peak is evident between +11,591 and +12,144 bp from the transcription start site (red arrowhead).

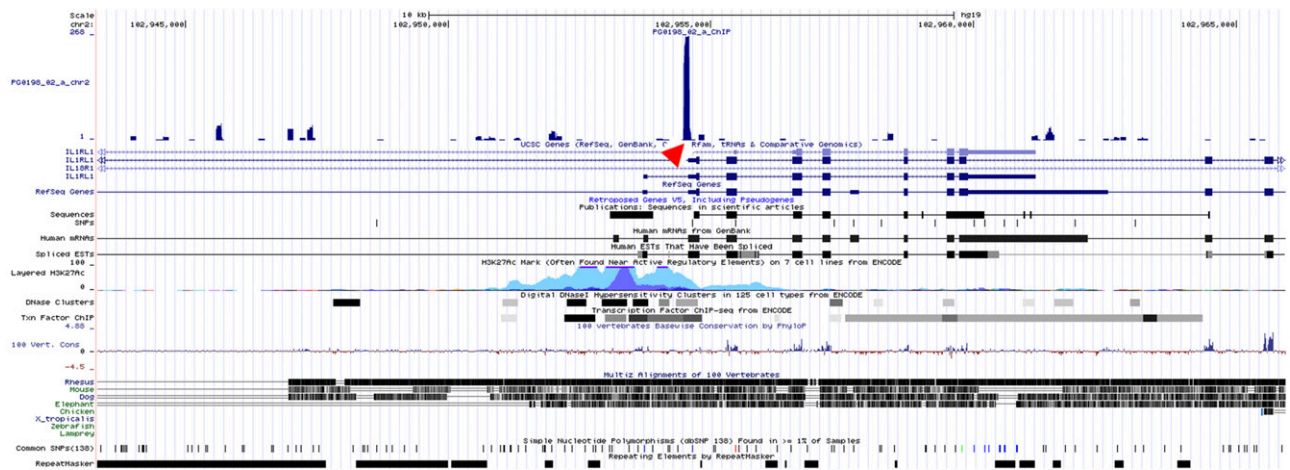

**Fig. S5.** ChIP-seq data from *IL1RL1*. Genome Browser display of the *IL1RL1* locus on chr2 from the human assembly. The highest peak is evident between +26,346 and +26,980 bp from the transcription start site (red arrowhead).

**Table S1. Histomorphometric analyses of subchondral bones in knee joints of *Hes1<sup>fl/fl</sup>* (Cntl) and *Col2a1-CreERT;Hes1<sup>fl/fl</sup>* (cKO) littermates (8-wk-old)**

| Analysis   | Cntl            | cKO            |
|------------|-----------------|----------------|
| BV/TV (%)  | 13.48 ± 10.0    | 13.48 ± 4.24   |
| Tb.Th (μm) | 39.39 ± 13.77   | 41.52 ± 8.16   |
| Tb.N (mm)  | 3.02 ± 2.31     | 3.20 ± 0.50    |
| Tb.Sp (μm) | 430.24 ± 374.08 | 277.06 ± 60.88 |

Data are expressed as means ± SD of three mice per group. BV/TV, bone volume/tissue volume; Tb.N, trabecular number; Tb.Th, trabecular thickness; Tb.Sp, trabecular spacing.

**Table S2. List of the top 30 up-regulated genes following *Hes1* overexpression**

| Gene symbol    | Definition                                        | Accession no. | Signal intensity |          |               |
|----------------|---------------------------------------------------|---------------|------------------|----------|---------------|
|                |                                                   |               | GFP              | HES1     | Fold-increase |
| <i>Oas2</i>    | 2'-5' oligoadenylate synthetase 2                 | NM_145227     | 16.5             | 79805.3  | 4846.250044   |
| <i>Mx1</i>     | Myxovirus (influenza virus) resistance 1          | NM_010846     | 12.6             | 50459.2  | 4003.665635   |
| <i>Oas1a</i>   | 2'-5' oligoadenylate synthetase 1A                | NM_145211     | 118.0            | 232615.2 | 1971.11468    |
| <i>Zbp1</i>    | Z-DNA binding protein 1                           | NM_021394     | 10.4             | 19954.0  | 1927.793365   |
| <i>Vgf</i>     | VGF nerve growth factor inducible                 | NM_001039385  | 14.5             | 25513.1  | 1762.647099   |
| <i>Csprs</i>   | Component of Sp100-rs                             | NM_033616     | 12.6             | 18594.3  | 1480.388952   |
| <i>Trim30a</i> | Tripartite motif-containing 30A                   | NM_009099     | 9.2              | 13041.5  | 1418.507871   |
| <i>Ifi44l</i>  | IFN-induced protein 44 like                       | NM_031367     | 9.5              | 10132.8  | 1067.758234   |
| <i>Gvin1</i>   | GTPase, very large IFN inducible 1                | NM_029000     | 9.6              | 9953.5   | 1039.052      |
| <i>Oas1f</i>   | 2'-5' oligoadenylate synthetase 1F                | NM_145153     | 124.4            | 95565.8  | 768.4231532   |
| <i>Trim30d</i> | Tripartite motif-containing 30D                   | NM_199146     | 10.1             | 7059.6   | 696.8601153   |
| <i>Gbp6</i>    | Guanylate binding protein 6                       | NM_194336     | 16.1             | 9892.7   | 613.1444228   |
| <i>Mnda</i>    | Myeloid cell nuclear differentiation antigen      | NM_001033450  | 22.9             | 13997.1  | 611.3529946   |
| <i>Iigp1</i>   | IFN inducible GTPase 1                            | NM_001146275  | 15.2             | 8867.6   | 583.0995978   |
| <i>Mx2</i>     | Myxovirus (influenza virus) resistance 2          | NM_013606     | 231.4            | 118732.2 | 513.206726    |
| <i>Phf11d</i>  | PHD finger protein 11D                            | NM_199015     | 72.7             | 36834.3  | 506.6135702   |
| <i>Rsad2</i>   | Radical S-adenosyl methionine domain containing 2 | NM_021384     | 57.0             | 28424.6  | 498.6956843   |
| <i>Phf11a</i>  | PHD finger protein 11A                            | NM_172603     | 38.1             | 18836.5  | 495.0330322   |
| <i>Irf7</i>    | IFN regulatory factor 7                           | NM_016850     | 52.8             | 25160.6  | 476.8225082   |
| <i>Oas1l</i>   | 2'-5' oligoadenylate synthetase-like 1            | NM_145209     | 169.4            | 61313.4  | 361.9340508   |
| <i>Tgtp2</i>   | T-cell specific GTPase 2                          | NM_001145164  | 509.2            | 154260.6 | 302.9477354   |
| <i>Cmpk2</i>   | Cytidine monophosphate (UMP-CMP) kinase 2         | NM_020557     | 18.6             | 5357.3   | 288.6413947   |
| <i>Oasl2</i>   | 2'-5' oligoadenylate synthetase-like 2            | NM_011854     | 553.0            | 146729.1 | 265.3257035   |
| <i>Cxcl10</i>  | Chemokine (C-X-C motif) ligand 10                 | NM_021274     | 1035.1           | 262780.8 | 253.8728529   |
| <i>Il6</i>     | Interleukin 6                                     | NM_031168     | 88.2             | 21147.6  | 239.7370111   |
| <i>Usp18</i>   | Ubiquitin specific peptidase 18                   | NM_011909     | 493.4            | 118274.2 | 239.7165883   |
| <i>Npy1r</i>   | Neuropeptide Y receptor Y1                        | NM_010934     | 30.2             | 7122.4   | 235.5499841   |
| <i>Vmn1r65</i> | Vomeroneasal 1 receptor 65                        | NM_030738     | 8.0              | 1814.6   | 226.1623612   |
| <i>Gbp5</i>    | Guanylate binding protein 5                       | NM_153564     | 41.1             | 9245.1   | 225.058535    |
| <i>Phf11b</i>  | PHD finger protein 11B                            | NM_001164327  | 78.3             | 17561.8  | 224.247971    |

**Table S3. List of top 30 down-regulated genes following Hes1 overexpression**

| Gene symbol    | Definition                                                 | Accession no. | Signal intensity |        | Fold-increase |
|----------------|------------------------------------------------------------|---------------|------------------|--------|---------------|
|                |                                                            |               | GFP              | HES1   |               |
| <i>Pde3a</i>   | Phosphodiesterase 3A, cGMP inhibited                       | NM_018779     | 4710.7           | 23.8   | 0.005051014   |
| <i>Zdhhc24</i> | Zinc finger, DHHC domain containing 24                     | NM_027476     | 27404.3          | 726.6  | 0.026515558   |
| <i>Klra8</i>   | Killer cell lectin-like receptor, subfamily A, member 8    | NM_010650     | 306.6            | 8.7    | 0.028504689   |
| <i>Olf677</i>  | Olfactory receptor 677                                     | NM_146358     | 274.3            | 8.8    | 0.032230603   |
| <i>Madcam1</i> | Mucosal vascular addressin cell adhesion molecule 1        | NM_013591     | 1500.2           | 58.3   | 0.038869904   |
| <i>Plaa</i>    | Phospholipase A2, activating protein                       | NM_172695     | 249.4            | 10.1   | 0.040485766   |
| <i>Naa11</i>   | N( $\omega$ )-acetyltransferase 11, NatA catalytic subunit | NM_001033191  | 321.3            | 15.1   | 0.047056364   |
| <i>Ahi1</i>    | Abelson helper integration site 1                          | NM_026203     | 6171.1           | 297.5  | 0.048214357   |
| <i>Shh</i>     | Sonic hedgehog                                             | NM_009170     | 171.0            | 9.4    | 0.054837432   |
| <i>Lrrc6</i>   | Leucine rich repeat containing 6                           | NM_019457     | 473.5            | 27.1   | 0.057170221   |
| <i>Nmur1</i>   | Neuromedin U receptor 1                                    | NM_010341     | 220.1            | 12.9   | 0.058800034   |
| <i>Olf1240</i> | Olfactory receptor 1240                                    | NM_146808     | 173.8            | 10.6   | 0.060909518   |
| <i>Olf374</i>  | Olfactory receptor 374                                     | NM_146338     | 141.3            | 9.4    | 0.066199534   |
| <i>Aspm</i>    | Asp (abnormal spindle)-like, microcephaly associated       | NM_009791     | 24063.5          | 1635.3 | 0.067959686   |
| <i>Scn3a</i>   | Sodium channel, voltage-gated, type III, alpha             | NM_018732     | 397.4            | 27.4   | 0.069046182   |
| <i>Mageb4</i>  | Melanoma antigen, family B, 4                              | NM_001033492  | 136.1            | 9.9    | 0.072406481   |
| <i>Ikzf1</i>   | IKAROS family zinc finger 1 (Ikzf1)                        | NM_001025597  | 136.7            | 10.3   | 0.075601771   |
| <i>Olf761</i>  | Olfactory receptor 761                                     | NM_001011829  | 110.8            | 8.5    | 0.076600134   |
| <i>Kmo</i>     | Kynurenine 3-monooxygenase                                 | NM_133809     | 416.3            | 32.5   | 0.077960937   |
| <i>Olf1255</i> | Olfactory receptor 1255                                    | NM_146977     | 128.6            | 10.2   | 0.07956938    |
| <i>Prkcz</i>   | Protein kinase C, $\zeta$                                  | NM_008860     | 113.5            | 9.9    | 0.087353479   |
| <i>Lcn12</i>   | Lipocalin 12                                               | NM_029958     | 271.1            | 23.8   | 0.087707076   |
| <i>Ace3</i>    | Angiotensin I converting enzyme                            | NM_001101453  | 119.1            | 10.7   | 0.089583886   |
| <i>Trim55</i>  | Tripartite motif-containing 55                             | NM_001081281  | 304.9            | 27.9   | 0.091456105   |
| <i>Fam71b</i>  | Family with sequence similarity 71, member B               | NM_001013783  | 120.7            | 11.2   | 0.093117221   |
| <i>Rac2</i>    | RAS-related C3 botulinum substrate 2                       | NM_009008     | 236.1            | 22.3   | 0.094641156   |
| <i>Olf930</i>  | Olfactory receptor 930                                     | NM_146272     | 102.1            | 10.1   | 0.098727764   |
| <i>H60a</i>    | Histocompatibility 60a                                     | NM_010400     | 6911.4           | 693.2  | 0.100298079   |
| <i>Palm3</i>   | Paralemmin 3                                               | NM_028877     | 136.1            | 14.5   | 0.106207869   |
| <i>Flg2</i>    | Filaggrin family member 2                                  | NM_001013804  | 83.7             | 9.1    | 0.108836368   |

**Table S4. List of mechanical stress-related genes up-regulated by Hes1 overexpression**

| Gene symbol   | Definition                                           | Accession no. | Signal intensity |             | Fold-increase |
|---------------|------------------------------------------------------|---------------|------------------|-------------|---------------|
|               |                                                      |               | GFP              | HES1        |               |
| <i>P2rx7</i>  | Purinergic receptor P2X, ligand-gated ion channel, 7 | NM_001038887  | 208.4750897      | 4600.075202 | 22.06534703   |
| <i>Stat1</i>  | Signal transducer and activator of transcription 1   | NM_009283     | 35.83590909      | 608.0865616 | 16.9686378    |
| <i>Lck</i>    | Lymphocyte protein tyrosine kinase                   | NM_010693     | 674.5735014      | 10477.8277  | 15.53252193   |
| <i>Pde2a</i>  | Phosphodiesterase 2A, cGMP-stimulated                | NM_001143848  | 228.6839863      | 1734.16365  | 7.583231683   |
| <i>Ankrd1</i> | Ankyrin repeat domain 1                              | NM_013468     | 1385.022269      | 8879.072285 | 6.410779441   |



**Table S5. List of inflammation-related genes up-regulated by Hes1 overexpression**

| Gene symbol     | Definition                                                  | Accession no. | Signal intensity |             | Fold-increase |
|-----------------|-------------------------------------------------------------|---------------|------------------|-------------|---------------|
|                 |                                                             |               | GFP              | HES1        |               |
| <i>Cxcl10</i>   | Chemokine (C-X-C motif) ligand 10                           | NM_021274     | 1035.088088      | 262780.766  | 253.8728529   |
| <i>Il6</i>      | Interleukin 6                                               | NM_031168     | 88.21168017      | 21147.60455 | 239.7370111   |
| <i>Cxcl9</i>    | Chemokine (C-X-C motif) ligand 9                            | NM_008599     | 9.064536627      | 1486.693037 | 164.0120282   |
| <i>Apod</i>     | Apolipoprotein D                                            | NM_007470     | 190.966717       | 24524.48761 | 128.4228372   |
| <i>Tlr3</i>     | Toll-like receptor 3                                        | NM_126166     | 79.9117321       | 4130.837039 | 51.69249784   |
| <i>Ccl2</i>     | Chemokine (C-C motif) ligand 2                              | NM_011333     | 713.3851706      | 32362.18847 | 45.36425735   |
| <i>Ccl7</i>     | Chemokine (C-C motif) ligand 7                              | NM_013654     | 335.6995956      | 11257.86982 | 33.53554775   |
| <i>P2rx7</i>    | Purinergic receptor P2X, ligand-gated ion channel, 7        | NM_001038887  | 208.4750897      | 4600.075202 | 22.06534703   |
| <i>Ccr12</i>    | Chemokine (C-C motif) receptor-like 2                       | NM_017466     | 68.4913974       | 1301.218906 | 18.99828235   |
| <i>Ifng</i>     | IFN- $\gamma$                                               | NM_008337     | 11.19467225      | 187.3166384 | 16.73265944   |
| <i>Naip6</i>    | NLR family, apoptosis inhibitory protein 6                  | NM_010871     | 8.477237109      | 139.4267096 | 16.44718766   |
| <i>Cd40</i>     | CD40 antigen                                                | NM_011611     | 10.03434907      | 151.6106737 | 15.10916878   |
| <i>Zfp36</i>    | Zinc finger protein 36                                      | NM_011756     | 13.95101956      | 206.4052363 | 14.79499297   |
| <i>Vnn1</i>     | Vanin 1                                                     | NM_011704     | 15.8489333       | 203.577347  | 12.84486112   |
| <i>Ccl8</i>     | Chemokine (C-C motif) ligand 8                              | NM_021443     | 58.99512447      | 693.6893927 | 11.758419     |
| <i>Trp73</i>    | Transformation related protein 73                           | NM_011642     | 24.96404864      | 258.3631958 | 10.34941085   |
| <i>S100a8</i>   | S100 calcium binding protein A8                             | NM_013650     | 16.5642753       | 169.4070307 | 10.22725279   |
| <i>Serpinb9</i> | Serine (or cysteine) peptidase inhibitor, clade B, member 9 | NM_009256     | 244.1270736      | 2282.207769 | 9.348441923   |
| <i>Ahsg</i>     | $\alpha$ -2-HS-glycoprotein                                 | NM_013465     | 10.07827856      | 91.8978879  | 9.118411182   |
| <i>Hmox1</i>    | Heme oxygenase (decycling) 1                                | NM_010442     | 3628.910479      | 30898.0466  | 8.514414111   |
| <i>Naip2</i>    | NLR family, apoptosis inhibitory protein 2                  | NM_010872     | 22.8900897       | 192.0525437 | 8.390204939   |
| <i>Ccl5</i>     | Chemokine (C-C motif) ligand 5                              | NM_013653     | 10502.19276      | 84944.65226 | 8.088277773   |
| <i>Il1rl1</i>   | Interleukin 1 receptor-like 1                               | NM_010743     | 686.0549997      | 5483.020086 | 7.992099887   |
| <i>Pde2a</i>    | Phosphodiesterase 2A, cGMP-stimulated                       | NM_001143848  | 228.6839863      | 1734.16365  | 7.583231683   |
| <i>Ccl12</i>    | Chemokine (C-C motif) ligand 12                             | NM_011331     | 10.47869892      | 58.89732639 | 5.62067169    |
| <i>Ccl3</i>     | Chemokine (C-C motif) ligand 3                              | NM_011337     | 9.652403763      | 53.54774776 | 5.547607527   |
| <i>Tnf</i>      | Tumor necrosis factor                                       | NM_013693     | 8.627355831      | 47.02896662 | 5.451144886   |
| <i>Klkb1</i>    | Kallikrein B, plasma 1                                      | NM_008455     | 24.65734731      | 132.0032586 | 5.353506072   |
| <i>Ccl4</i>     | Chemokine (C-C motif) ligand 4                              | NM_013652     | 10.64395506      | 56.56105382 | 5.313913249   |
| <i>Tnfip3</i>   | Tumor necrosis factor, alpha-induced protein 3              | NM_009397     | 1400.149691      | 7259.254592 | 5.184627498   |
| <i>Cxcl13</i>   | Chemokine (C-X-C motif) ligand 13                           | NM_018866     | 21.09724589      | 104.6028322 | 4.958127367   |
| <i>Nr1h3</i>    | Nuclear receptor subfamily 1, group H, member 3             | NM_013839     | 125.2198918      | 593.848623  | 4.742446384   |
| <i>Nupr1</i>    | Nuclear protein transcription regulator 1                   | NM_019738     | 11321.89806      | 52647.51153 | 4.65006055    |
| <i>Itgb6</i>    | Integrin beta 6 (Itgb6), transcript variant 2               | NM_021359     | 9.408618128      | 42.78180918 | 4.547087425   |
| <i>Hyal1</i>    | Hyaluronoglucosaminidase 1                                  | NM_008317     | 36.95654689      | 164.2328202 | 4.443943876   |
| <i>Pla2g7</i>   | Phospholipase A2, group VII                                 | NM_013737     | 247.9056351      | 1087.677442 | 4.387465583   |
| <i>Il17f</i>    | Interleukin 17F                                             | NM_145856     | 25.30738442      | 108.8969345 | 4.302970734   |
| <i>Kl</i>       | Klotho                                                      | NM_013823     | 9.212208226      | 38.68663948 | 4.199496855   |
| <i>Adora2b</i>  | Adenosine A2b receptor                                      | NM_007413     | 20.32735765      | 84.9084311  | 4.177052057   |
| <i>Il33</i>     | Interleukin 33                                              | NM_001164724  | 39.96758039      | 161.5887215 | 4.042994845   |
